# Supplementary material for: Mechanism of the solvent-free reactions between indole derivatives and 4-nitrobenzaldehyde studied by solid-state NMR and DFT calculations
Source: Royal Society of Chemistry journal article supplement (doi:10.1039/c2ce25754h), 2012-01-01
Supplement: c2ce25754h.pdf [file c2ce25754h.pdf]

Supporting Information

**Mechanism of the solvent-free reactions between indole derivatives and 4-nitrobenzaldehyde studied by solid-state NMR and DFT calculation**

Michele R. Chierotti, Katia Gaglioti, Roberto Gobetto,\* Margherita Barbero, Carlo Nervi

Department of Chemistry, University of Torino, Via p. Giuria n° 7, I-10125 Torino, Italy

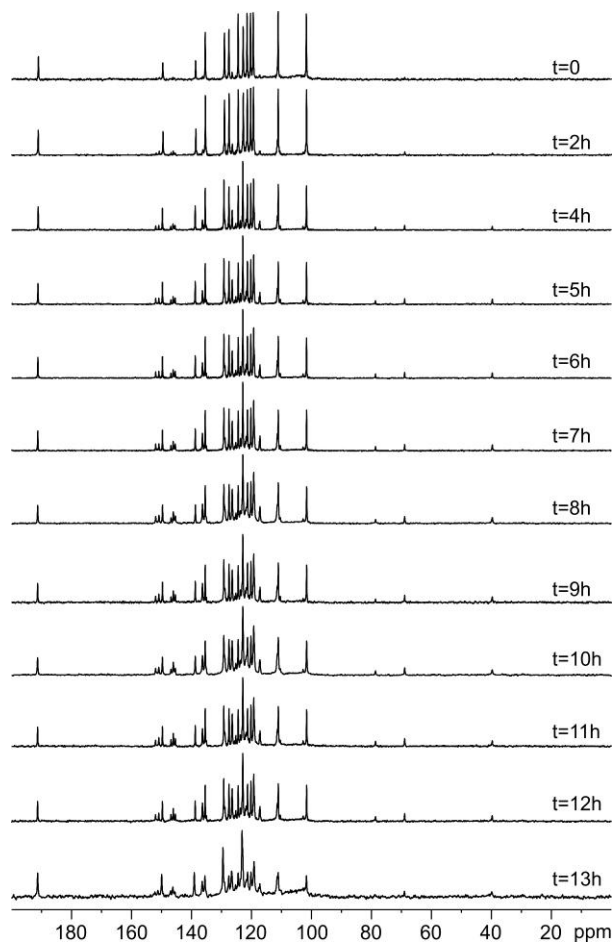

**Figure S1:** <sup>13</sup>C (100.64 MHz) DE spectra of the reaction between indole (**1<sup>A</sup>**) and 4-nitrobenzaldehyde (**2**) recorded with a spinning speed of 12 kHz at RT.

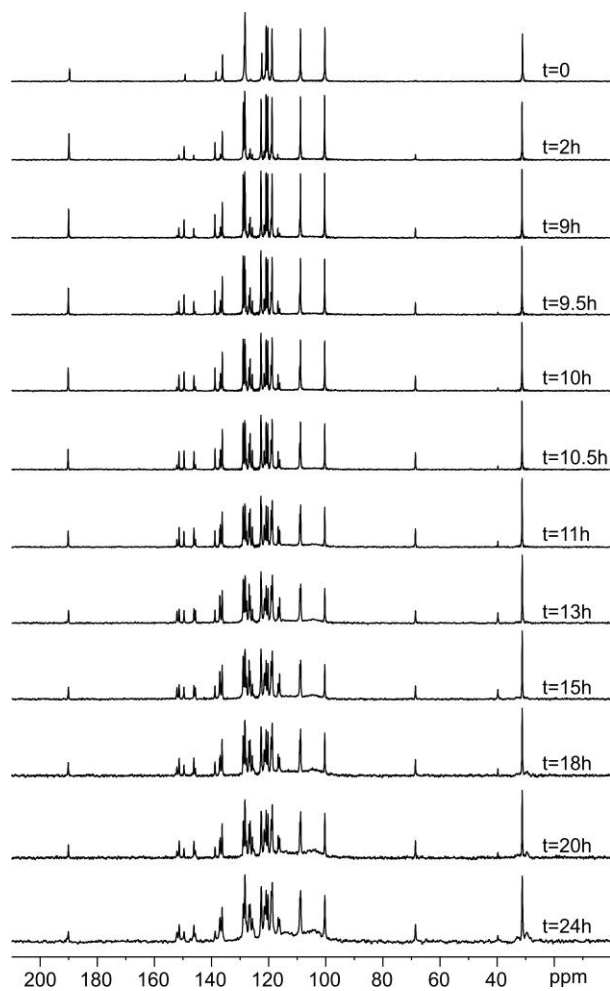

**Figure S2:** <sup>13</sup>C (100.64 MHz) DE spectra of the reaction between N-methylindole (**1<sup>B</sup>**) and 4-nitrobenzaldehyde (**2**) recorded with a spinning speed of 12 kHz and at RT.
